# Supplementary material for: Polymorphs, cocrystal and hydrate of nilutamide
Source: Royal Society of Chemistry journal article supplement (doi:10.1039/d3ce00328k), 2023-01-01
Supplement: d3ce00328k1.pdf [file d3ce00328k1.pdf]

**Polymorphs, cocrystal and hydrate of nilutamide**

*Jupally Prashanth<sup>ab</sup>, Artem O. Surov<sup>c\*</sup>, Ksenia V. Drozd<sup>c</sup>, German L. Perlovich<sup>c</sup>, Sridhar  
Balasubramanian<sup>ab\*</sup>*

<sup>a</sup>Centre for X-ray Crystallography, Department of Analytical & Structural Chemistry, CSIR-Indian Institute of Chemical Technology, Tarnaka, Uppal Road, Hyderabad-500007, Telangana, India.

<sup>b</sup>Academy of Scientific and Innovative Research (AcSIR), Ghaziabad- 201 002, India

<sup>c</sup>G.A. Krestov Institute of Solution Chemistry RAS, 153045, Ivanovo, Russia.

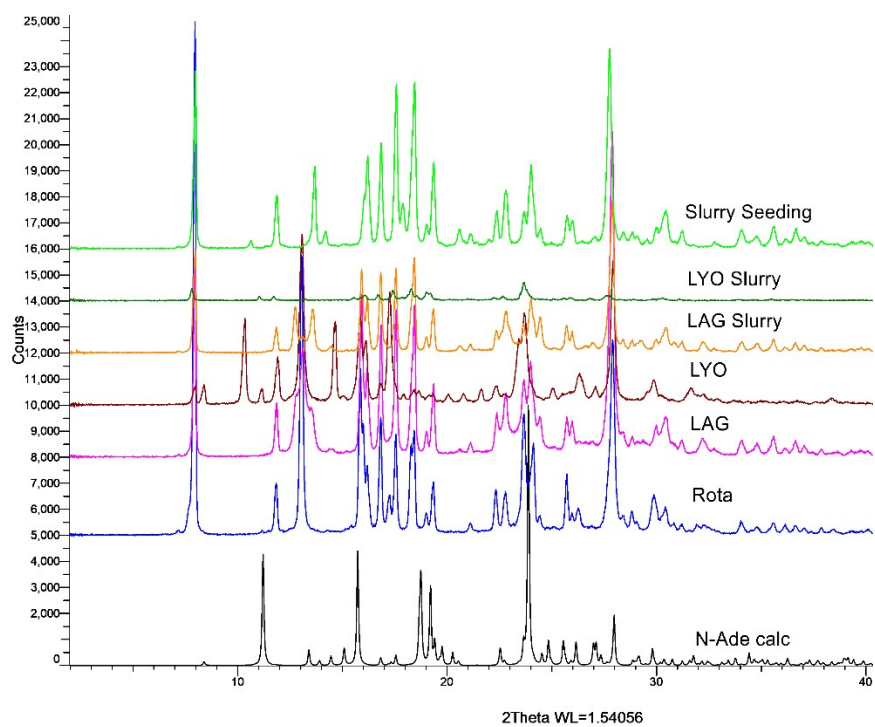

Figure S1. PXRd overlay of [Nil+Adn] (1:1) calc (obtained from SCRD data), various single step [rota evaporator (Rota), LAG, LYO] and multi-step [LAG followed by slurry (LAG Slurry), LYO followed by slurry (LYO Slurry)] and slurry seeding (phase pure cocystal seeds were added to slurry which has initial components) experimental techniques.

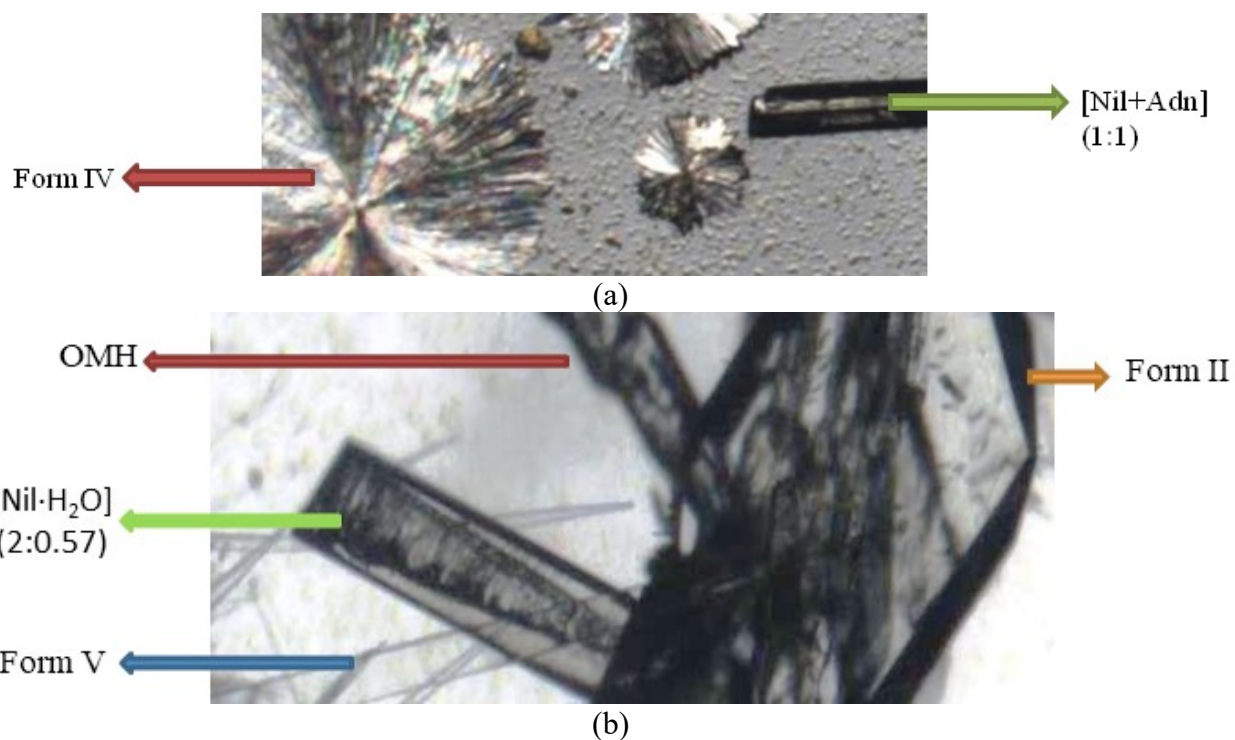

Figure S2. Microscopic image of (a) Nil Form IV and [Nil+Adn] (1:1) crystals and (b) Nil Form V, [Nil·H<sub>2</sub>O] (2:0.57), Nil Form II and OMH crystals.

## S1. Thermal analysis

The DSC thermogram of the [Nil+Adn] (1:1) cocrystal shows a sharp endotherm with an onset melting point of  $203.2\pm 0.2^\circ\text{C}$  and  $\Delta H_{\text{fus}} = 38.9\pm 0.5 \text{ J}\cdot\text{g}^{-1}$  (Fig. S3), which falls in between Nil Form I ( $153.3^\circ\text{C}$ )<sup>1</sup> and Adn ( $360^\circ\text{C}$ )<sup>2</sup>. The results of HSM show a melting range of around  $202^\circ\text{C}$  to  $212^\circ\text{C}$  (Fig. S4), which is also in line with DSC data. DSC cannot be performed for Nil Forms IV and V and [Nil·H<sub>2</sub>O] (2:0.57) due to the lack of phase-pure material. However, HSM was performed (Fig. S4), in which Form IV and Form V crystals melted around  $138^\circ\text{C}$  to  $140^\circ\text{C}$ . HSM of [Nil·H<sub>2</sub>O] (2:0.57) (Fig. S4) shows dehydration (desolvation) at  $95^\circ\text{C}$ – $100^\circ\text{C}$  and completely melts at  $158^\circ\text{C}$ . After dehydration, the crystal was subjected to unit cell determination using SCXRD, which confirmed the conversion of [Nil·H<sub>2</sub>O] (2:0.57) into Nil Form II. The present observation of desolvation followed by melting of [Nil·H<sub>2</sub>O] (2:0.57) is in line with the unstable nilutamide hydrate as discussed by Trasi and Taylor.<sup>3</sup>

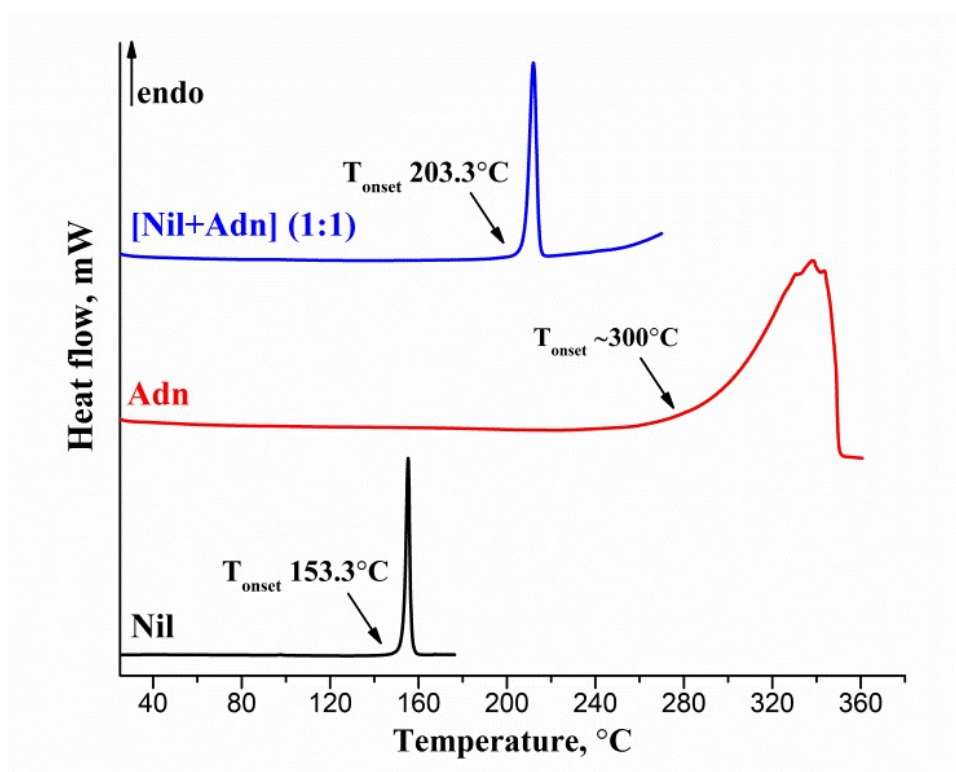

Figure S3. DSC thermograms of the parent compounds and [Nil+Adn] (1:1) cocrystal.

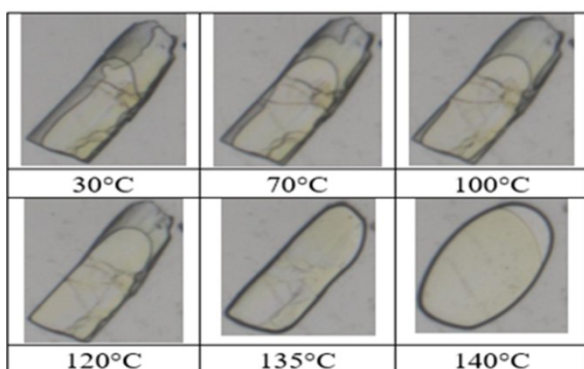

Form IV

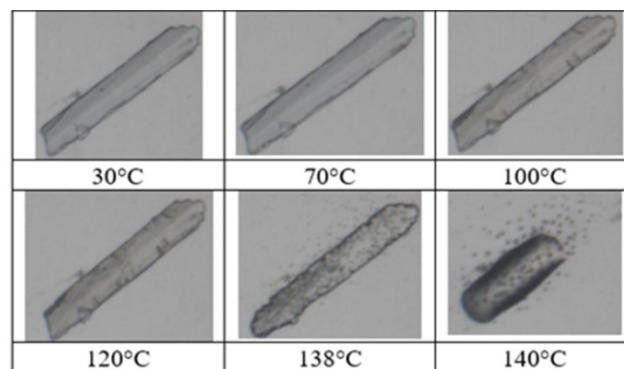

Form V

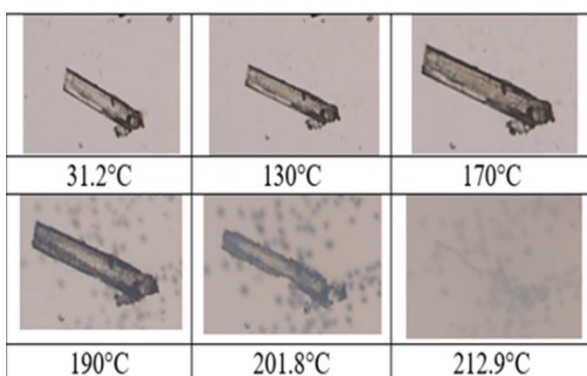

[NiI+Adn] (1:1)

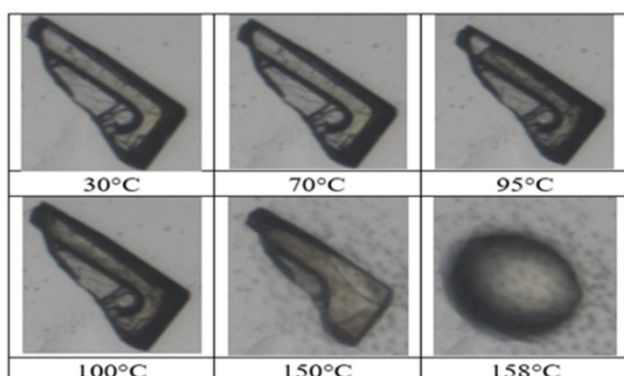

[NiI·H<sub>2</sub>O] (2:0.57)

Figure S4. HSM images of Form IV, Form V, [NiI+Adn] (1:1) and [NiI·H<sub>2</sub>O] (2:0.57).

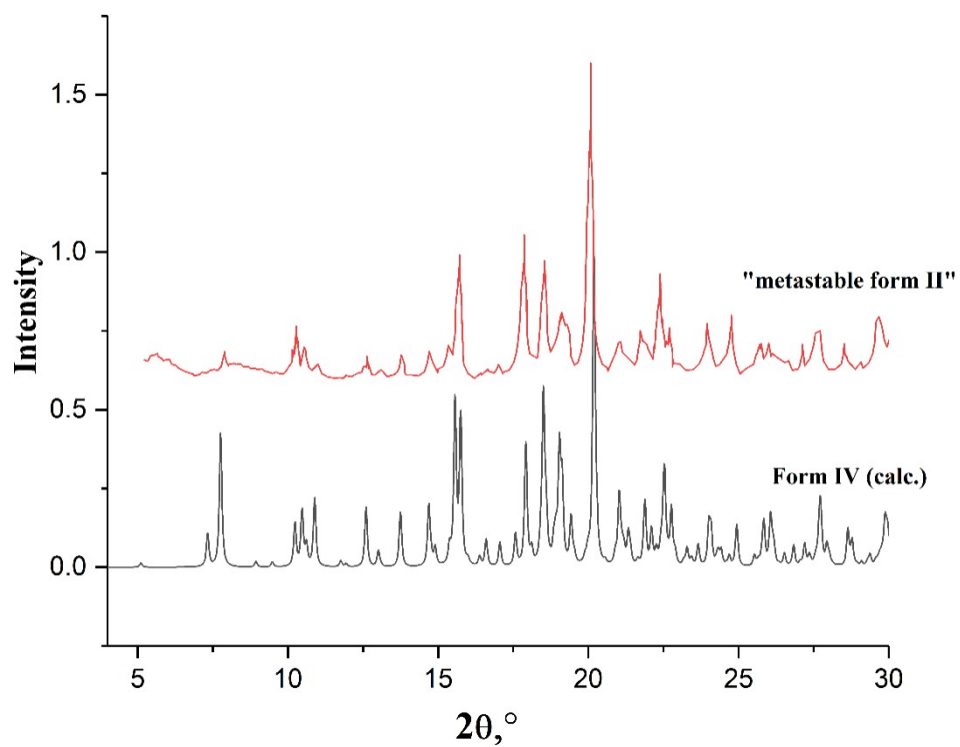

Figure S5. Calculated PXRD patterns of Nil Form IV and experimental PXRD patterns of “metastable form II” reproduced from Fig. 8 of the Trasi & Taylor paper (Trasi, N.S. and L.S. Taylor, *Nucleation and crystal growth of amorphous nilutamide – unusual low temperature behavior*. *CrystEngComm*, 2014. **16**(31): p. 7186-7195).

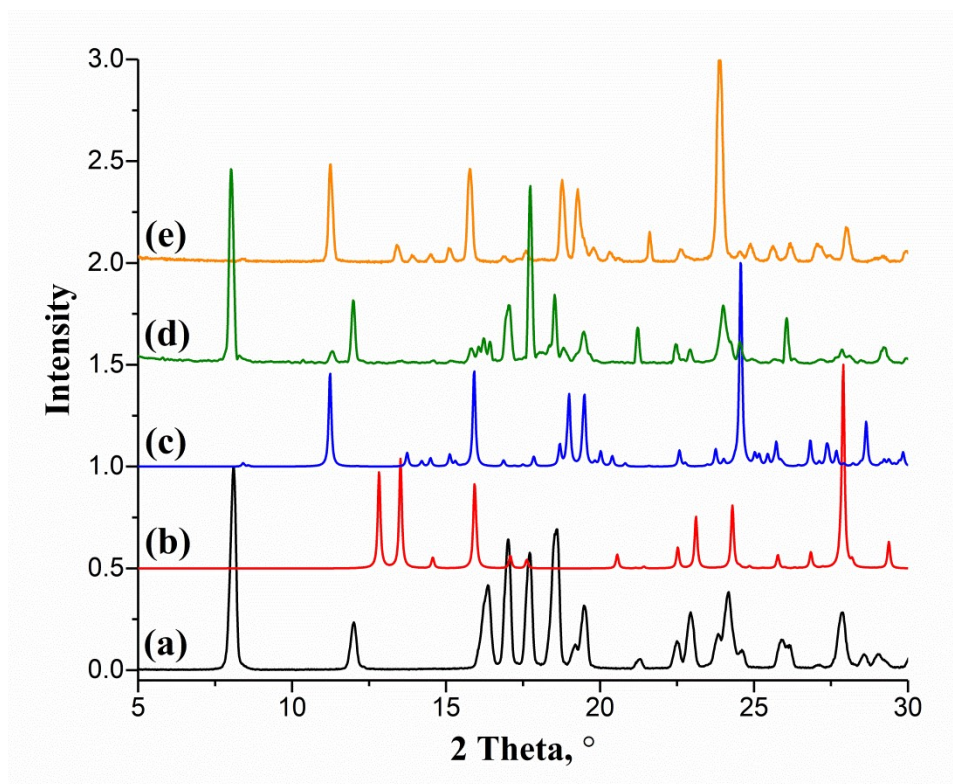

Figure S6. Experimental PXRD patterns of the solid phases after dissolution experiments in the blank pH 6.8 buffer solution (d) and pre-dissolved HPMC (e), compared with the parent compounds ((a) Nil, (b) Adn) and cocrystal (c).

Table S1. Crystallographic data and structure refinement parameters of the Nil solid forms

|                                                                                                                   | Nil Form IV                                                                                                               | Nil Form V                                                                   | [Nil·H <sub>2</sub> O]<br>(2:0.57)                                                                        | [Nil+Adn]<br>(1:1)                                                                                                             |
|-------------------------------------------------------------------------------------------------------------------|---------------------------------------------------------------------------------------------------------------------------|------------------------------------------------------------------------------|-----------------------------------------------------------------------------------------------------------|--------------------------------------------------------------------------------------------------------------------------------|
| <i>Crystal data</i>                                                                                               |                                                                                                                           |                                                                              |                                                                                                           |                                                                                                                                |
| Chemical formula                                                                                                  | C <sub>12</sub> H <sub>10</sub> F <sub>3</sub> N <sub>3</sub> O <sub>4</sub>                                              | C <sub>12</sub> H <sub>10</sub> F <sub>3</sub> N <sub>3</sub> O <sub>4</sub> | C <sub>12</sub> H <sub>10</sub> F <sub>3</sub> N <sub>3</sub> O <sub>4</sub> ·<br>0.285(H <sub>2</sub> O) | C <sub>12</sub> H <sub>10</sub> F <sub>3</sub> N <sub>3</sub> O <sub>4</sub> ·<br>C <sub>5</sub> H <sub>5</sub> N <sub>5</sub> |
| <i>M<sub>r</sub></i>                                                                                              | 317.23                                                                                                                    | 317.23                                                                       | 322.37                                                                                                    | 452.37                                                                                                                         |
| Crystal system, space group                                                                                       | Monoclinic,<br><i>P</i> 2 <sub>1</sub> / <i>c</i>                                                                         | Monoclinic,<br><i>P</i> 2 <sub>1</sub> / <i>n</i>                            | Triclinic,<br><i>P</i> $\bar{1}$                                                                          | Monoclinic,<br><i>P</i> 2 <sub>1</sub> / <i>c</i>                                                                              |
| Temperature (K)                                                                                                   | 100                                                                                                                       | 100                                                                          | 100                                                                                                       | 100                                                                                                                            |
| <i>a</i> , <i>b</i> , <i>c</i> (Å)                                                                                | 12.2681(13),<br>34.536(4),<br>9.8498(13)                                                                                  | 7.1966(5),<br>16.2038(12),<br>22.6209(15)                                    | 10.2797(10),<br>11.1802(11),<br>13.2382(13)                                                               | 7.3886 (5),<br>12.2118 (8),<br>20.8355 (13)                                                                                    |
| <i>α</i> , <i>β</i> , <i>γ</i> (°)                                                                                | 90,<br>100.837(5),<br>90                                                                                                  | 90,<br>94.633(2),<br>90                                                      | 86.915(3),<br>73.762(3),<br>68.854(3)                                                                     | 98.845 (3)                                                                                                                     |
| <i>V</i> (Å <sup>3</sup> )                                                                                        | 4098.9(8)                                                                                                                 | 2629.3(3)                                                                    | 1360.5(2)                                                                                                 | 1857.6 (2)                                                                                                                     |
| <i>Z</i>                                                                                                          | 12                                                                                                                        | 8                                                                            | 4                                                                                                         | 4                                                                                                                              |
| Radiation type                                                                                                    | Mo <i>Kα</i>                                                                                                              | Mo <i>Kα</i>                                                                 | Mo <i>Kα</i>                                                                                              | Mo <i>Kα</i>                                                                                                                   |
| <i>μ</i> (mm <sup>-1</sup> )                                                                                      | 0.14                                                                                                                      | 0.15                                                                         | 0.15                                                                                                      | 0.14                                                                                                                           |
| Crystal size (mm)                                                                                                 | 0.26×0.22×0.16                                                                                                            | 0.18×0.12×0.09                                                               | 0.20×0.19×0.18                                                                                            | 0.18 × 0.12 × 0.08                                                                                                             |
| <i>Data collection</i>                                                                                            |                                                                                                                           |                                                                              |                                                                                                           |                                                                                                                                |
| Diffractionmeter                                                                                                  | Bruker D8 QUEST PHOTON-III                                                                                                |                                                                              |                                                                                                           | Bruker D8<br>QUEST<br>PHOTON-100                                                                                               |
| Absorption correction                                                                                             | Multi-scan <i>SADABS</i> 2016/2: Krause, L., Herbst-Irmer, R., Sheldrick G.M. & Stalke D., J. Appl. Cryst. 48 (2015) 3-10 |                                                                              |                                                                                                           | Multi-scan<br><i>SADABS</i> , Bruker,<br>2016                                                                                  |
| <i>T<sub>min</sub></i> , <i>T<sub>max</sub></i>                                                                   | 0.589, 0.746                                                                                                              | 0.635, 0.746                                                                 | 0.665, 0.746                                                                                              | 0.686, 0.746                                                                                                                   |
| No. of measured,<br>independent and<br>observed [ <i>I</i> > 2σ( <i>I</i> )]<br>reflections                       | 51343,<br>8236,<br>3765                                                                                                   | 26240,<br>5290,<br>3029                                                      | 31137,<br>8307,<br>5999                                                                                   | 16255, 4256, 3867                                                                                                              |
| <i>R<sub>int</sub></i><br>(sin θ/λ) <sub>max</sub> (Å <sup>-1</sup> )                                             | 0.140<br>0.622                                                                                                            | 0.072<br>0.622                                                               | 0.046<br>0.715                                                                                            | 0.032<br>0.650                                                                                                                 |
| <i>Refinement</i>                                                                                                 |                                                                                                                           |                                                                              |                                                                                                           |                                                                                                                                |
| <i>R</i> [ <i>F</i> <sup>2</sup> > 2σ( <i>F</i> <sup>2</sup> )], <i>wR</i> ( <i>F</i> <sup>2</sup> ),<br><i>S</i> | 0.073, 0.175,<br>1.03                                                                                                     | 0.044, 0.107,<br>1.00                                                        | 0.040, 0.102,<br>1.02                                                                                     | 0.070, 0.169, 1.17                                                                                                             |
| No. of reflections                                                                                                | 8236                                                                                                                      | 5290                                                                         | 8307                                                                                                      | 4256                                                                                                                           |
| No. of parameters                                                                                                 | 659                                                                                                                       | 409                                                                          | 419                                                                                                       | 344                                                                                                                            |
| No. of restraints                                                                                                 | 10                                                                                                                        | 0                                                                            | 2                                                                                                         | 18                                                                                                                             |
| H-atom treatment                                                                                                  | H atoms treated by a mixture of independent and constrained refinement                                                    |                                                                              |                                                                                                           |                                                                                                                                |
| Δρ <sub>max</sub> , Δρ <sub>min</sub> (e Å <sup>-3</sup> )                                                        | 0.29, -0.30                                                                                                               | 0.25, -0.32                                                                  | 0.41, -0.27                                                                                               | 0.52, -0.40                                                                                                                    |



Table S2. Hydrogen bond geometries for the Nil solid forms

| $D-H\cdots A$                                                                                                                                                                  | $D-H$ , Å | $H\cdots A$ , Å | $D\cdots A$ , Å | $D-H\cdots A$ , ° |
|--------------------------------------------------------------------------------------------------------------------------------------------------------------------------------|-----------|-----------------|-----------------|-------------------|
| <b>Nil Form IV</b>                                                                                                                                                             |           |                 |                 |                   |
| N3A–H3NA $\cdots$ O4C <sup>i</sup>                                                                                                                                             | 0.83(5)   | 2.05(5)         | 2.861(5)        | 167(5)            |
| N3B–H3NB $\cdots$ O3A                                                                                                                                                          | 0.87(4)   | 2.04(4)         | 2.788(4)        | 143(4)            |
| N3C–H3NC $\cdots$ O3B                                                                                                                                                          | 0.84(4)   | 2.02(4)         | 2.846(5)        | 169(4)            |
| C2A–H2A $\cdots$ O4B <sup>ii</sup>                                                                                                                                             | 0.95      | 2.41            | 3.180(5)        | 139               |
| C2A–H2A $\cdots$ O1C <sup>i</sup>                                                                                                                                              | 0.95      | 2.33            | 2.959(9)        | 123               |
| C6A–H6A $\cdots$ O4A <sup>iii</sup>                                                                                                                                            | 0.95      | 2.43            | 3.258(5)        | 146               |
| C11A–H11B $\cdots$ O1A <sup>i</sup>                                                                                                                                            | 0.98      | 2.45            | 3.332(5)        | 150               |
| C2B–H2B $\cdots$ O1C <sup>iv</sup>                                                                                                                                             | 0.95      | 2.48            | 3.087(8)        | 122               |
| C11B–H11D $\cdots$ F1C <sup>i</sup>                                                                                                                                            | 0.98      | 2.47            | 3.286(10)       | 141               |
| C11B–H11F $\cdots$ O3A                                                                                                                                                         | 0.98      | 2.60            | 3.316(5)        | 130               |
| C3C–H3C $\cdots$ O4B <sup>v</sup>                                                                                                                                              | 0.95      | 2.60            | 3.528(5)        | 166               |
| C11C–H11I $\cdots$ O2C <sup>i</sup>                                                                                                                                            | 0.98      | 2.53            | 3.372(6)        | 144               |
| Symmetry codes: (i) $x+1, y, z$ ; (ii) $x, y, z-1$ ; (iii) $x, -y+3/2, z+1/2$ ; (iv) $x+1, y, z+1$ ; (v) $x-1, y, z-1$                                                         |           |                 |                 |                   |
| <b>Nil Form V</b>                                                                                                                                                              |           |                 |                 |                   |
| N3A–H3AA $\cdots$ O4B                                                                                                                                                          | 0.85(3)   | 2.07(3)         | 2.911(3)        | 173(2)            |
| N3B–H3BA $\cdots$ O4A                                                                                                                                                          | 0.81(3)   | 2.17(3)         | 2.967(3)        | 168(2)            |
| C12A–H12B $\cdots$ F3A <sup>i</sup>                                                                                                                                            | 0.98      | 2.35            | 3.169(3)        | 141               |
| C11B–H11D $\cdots$ F3B <sup>ii</sup>                                                                                                                                           | 0.98      | 2.40            | 3.253(3)        | 145               |
| Symmetry codes: (i) $-x+3/2, y+1/2, -z+3/2$ ; (ii) $-x+5/2, y-1/2, -z+3/2$                                                                                                     |           |                 |                 |                   |
| <b>[Nil·H<sub>2</sub>O] (2:0.57)</b>                                                                                                                                           |           |                 |                 |                   |
| N3A–H3AA $\cdots$ O3B                                                                                                                                                          | 0.88      | 2.14            | 2.9839 (13)     | 161               |
| N3B–H3BA $\cdots$ O3B <sup>i</sup>                                                                                                                                             | 0.88      | 2.24            | 2.9759 (14)     | 141               |
| N3B–H3BA $\cdots$ O1B <sup>ii</sup>                                                                                                                                            | 0.88      | 2.43            | 3.1406 (14)     | 138               |
| O1W–H1W $\cdots$ O4A <sup>iii</sup>                                                                                                                                            | 0.90(1)   | 1.89(1)         | 2.780(2)        | 172(3)            |
| O1W–H2W $\cdots$ O4A                                                                                                                                                           | 0.90(2)   | 1.93(3)         | 2.826(2)        | 173(4)            |
| C11A–H11B $\cdots$ O1A <sup>iv</sup>                                                                                                                                           | 0.98      | 2.59            | 3.2520(18)      | 125               |
| C11A–H11C $\cdots$ O1B <sup>ii</sup>                                                                                                                                           | 0.98      | 2.58            | 3.5280(17)      | 162               |
| C3B–H3B $\cdots$ O1W <sup>v</sup>                                                                                                                                              | 0.95      | 2.21            | 3.147(2)        | 167               |
| C12B–H12D $\cdots$ O1W <sup>i</sup>                                                                                                                                            | 0.98      | 2.49            | 3.410(2)        | 157               |
| Symmetry codes: (i) $-x, -y+2, -z$ ; (ii) $x, y+1, z$ ; (iii) $-x+1, -y+1, -z$ ; (iv) $x-1, y+1, z$ ; (v) $-x, -y+1, -z$                                                       |           |                 |                 |                   |
| <b>[Nil+Adn] (1:1)</b>                                                                                                                                                         |           |                 |                 |                   |
| N3–H1N $\cdots$ N8                                                                                                                                                             | 0.85(4)   | 2.08(4)         | 2.915(3)        | 171(4)            |
| N4–H2N $\cdots$ N6 <sup>i</sup>                                                                                                                                                | 0.86(4)   | 2.24(5)         | 3.099(4)        | 175(4)            |
| N4–H3N $\cdots$ O3                                                                                                                                                             | 0.90(4)   | 2.06(4)         | 2.917(3)        | 158(4)            |
| N7–H4N $\cdots$ N5 <sup>ii</sup>                                                                                                                                               | 1.00(5)   | 1.85(5)         | 2.829(3)        | 167(4)            |
| C2–H2 $\cdots$ O1 <sup>iii</sup>                                                                                                                                               | 0.95      | 2.40            | 3.321(4)        | 163               |
| C3–H3 $\cdots$ O4 <sup>iv</sup>                                                                                                                                                | 0.95      | 2.50            | 3.300(4)        | 142               |
| C11–H11C $\cdots$ O3 <sup>v</sup>                                                                                                                                              | 0.98      | 2.45            | 3.343(4)        | 152               |
| C12–H12C $\cdots$ F2 <sup>vi</sup>                                                                                                                                             | 0.98      | 2.35            | 3.039(8)        | 126               |
| Symmetry codes: (i) $-x+1, y-1/2, -z+3/2$ ; (ii) $-x+1, y+1/2, -z+3/2$ ; (iii) $-x, y+1/2, -z+1/2$ ; (iv) $-x, y-1/2, -z+1/2$ ; (v) $-x, -y+1, -z+1$ ; (vi) $-x+1, -y+1, -z+1$ |           |                 |                 |                   |

Table S3. Details of solvents and results obtained using different techniques for getting phase pure compound through single step process.

| Initial phase                                                         | Experiment type    | Solvents*                                          | Time     | Result                           |
|-----------------------------------------------------------------------|--------------------|----------------------------------------------------|----------|----------------------------------|
| Physical mixture of Nil (20 mg) and Adn (17.03 mg) in 1:2 molar ratio | LAG                | 2.2 ml of ACN/H <sub>2</sub> O mixture (1:10, v:v) | 1 h      | Physical mixture of Nil and Adn  |
|                                                                       | LYO                | 4 ml of ACN/H <sub>2</sub> O mixture (1:1, v:v)    | 3 h      | [Nil+Adn] (1:1), Form I, Form II |
|                                                                       | Rotary evaporation | 4 ml of ACN/H <sub>2</sub> O mixture (1:1, v:v)    | 30 min   | Form I, [Nil+Adn] (1:1)          |
| Nil(120mg) and Adn(51.1mg) in 1:1 ratio                               | Slurry             | 0.4 ml of ACN/H <sub>2</sub> O mixture (1:1, v:v)  | 4-6 days | [Nil+Adn] (1:1)                  |

\*ACN - acetonitrile

Table S4. Details of experiments, solvents and results obtained using two step techniques for getting phase pure compound

| Initial phase                                                         | Primary experiment |                                                   |        | Secondary experiment |                                                   |        | Result                          |
|-----------------------------------------------------------------------|--------------------|---------------------------------------------------|--------|----------------------|---------------------------------------------------|--------|---------------------------------|
|                                                                       | Type               | Solvents                                          | Time   | Type                 | Solvents                                          | Time   |                                 |
| Physical mixture of Nil (20 mg) and Adn (17.03 mg) in 1:2 molar ratio | Rotary evaporation | 4 ml of ACN/H <sub>2</sub> O mixture (1:1, v:v)   | 30 min |                      |                                                   |        | [Nil+Adn] (1:1)                 |
|                                                                       | LAG                | 0.4 ml of ACN/H <sub>2</sub> O mixture (1:1, v:v) | 1h     | Slurry               | 0.4 ml of ACN/H <sub>2</sub> O mixture (1:1, v:v) | 1 week | Physical mixture of Nil and Adn |
|                                                                       | LYO                | 4 ml of ACN/H <sub>2</sub> O mixture (1:1, v:v)   | 4 h    |                      |                                                   |        | [Nil+Adn] (1:1), Adn            |
| Physical mixture of Nil (50 mg) and Adn (42.5 mg) in 1:2 molar ratio  | Slurry             | 8 ml of ACN/H <sub>2</sub> O mixture (1:2, v:v)   | 1h     | Seeding*             | -                                                 | 1day   | Physical mixture of Nil and Adn |

\*(Phase pure [Nil+Adn] (1:1) seeds were added to the slurry having physical mixtures of Nil (50mg) and Adn (42.59mg) with 8 ml of acetonitrile/water mixture (1:2, v/v))

Table S5. Details of solvents used and crystals obtained using slow evaporation technique

| Initial phase                  | Solvents*                                                          | Result                                                        |
|--------------------------------|--------------------------------------------------------------------|---------------------------------------------------------------|
| [Nil+Adn] (1:1) (20mg)         | 6 ml of 2-butanone/ethanol/H <sub>2</sub> O mixture (1:1:1, v:v:v) | Nil Form IV, [Nil+Adn] (1:1)                                  |
| [Nil+Adn] (1:1) (20mg)         | 6 ml of DCE/ethanol/H <sub>2</sub> O mixture (1:1:1, v:v:v)        | Nil Form IV, [Nil+Adn] (1:1)                                  |
| Nil(20mg)+ OMH (10.97mg) (1:1) | 6 ml of ACN/H <sub>2</sub> O (1:1, v:v)                            | Nil Form V, Nil Form II, OMH, [Nil·H <sub>2</sub> O] (2:0.57) |
| [Nil+Adn] (1:1) (20mg)         | 4 ml of methanol/H <sub>2</sub> O (1:1, v:v)                       | Nil Form V, Nil Form I, [Nil+Adn] (1:1)                       |
| [Nil+Adn] (1:1) (20mg)         | 4 ml of ATN/H <sub>2</sub> O (1:1, v:v)                            | Nil Form I, [Nil+Adn] (1:1)                                   |
| [Nil+Adn] (1:1) (20mg)         | 5 ml of DMF                                                        | Nil Form I                                                    |
| [Nil+Adn] (1:1) (20mg)         | 4 ml of isopropanol/H <sub>2</sub> O (1:1, v:v)                    | Nil Form I                                                    |
| [Nil+Adn] (1:1) (20mg)         | 4 ml of Dox/H <sub>2</sub> O (1:1, v:v)                            | Nil Form II, [Nil+Adn] (1:1)                                  |

\*DCE-1,2 dichloroethane, ATN-Acetone, Dox-1,4-dioxane

Table S6. Details of experiments, solvents used and results obtained using different techniques for getting phase pure compounds of polymorphs and hydrate

| Initial phase                                                        | Solvents                                                 | Experiment type          | Result                      |
|----------------------------------------------------------------------|----------------------------------------------------------|--------------------------|-----------------------------|
| Physical mixture of Nil (20 mg) and OMH (10.97mg) in 1:1 molar ratio | 5.5 ml of ACN/H <sub>2</sub> O mixture (1:10, v:v)       | Anti-solvent addition    | Nil Form I, OMH             |
|                                                                      | 5.5 ml of ACN/H <sub>2</sub> O mixture (1:10, v:v)       | Slurry (3days)           | Nil Form I, OMH             |
|                                                                      | 5.5 ml of ACN/H <sub>2</sub> O mixture (1:10, v:v)       | Rotary evaporation (1 h) | Nil Form I                  |
| [Nil+Adn] (1:1) (20mg)                                               | 2.5 ml of 2-butanone/H <sub>2</sub> O mixture (1:4, v:v) | Slurry (3 days)          | Nil Form I, [Nil+Adn] (1:1) |
|                                                                      | 2.5 ml of 2-butanone/H <sub>2</sub> O mixture (1:4, v:v) | Rotary evaporation (1 h) | Nil Form I, [Nil+Adn] (1:1) |
| Nil (20mg)                                                           | 1 ml H <sub>2</sub> O                                    | Slurry (3days)           | Nil Form I                  |
|                                                                      | 1.5 ml of ACN/H <sub>2</sub> O mixture (2:1, v:v)        | Rotary evaporation (1 h) | Nil Form I                  |

Table S7. Selected torsion angles of the reported Nil forms

| Structure          | Molecule | C6–C1–N2–C10 ( $\tau_1$ ) | C6–C1–N2–C8( $\tau_2$ ) |
|--------------------|----------|---------------------------|-------------------------|
| Nil Form I         |          | -130.60(15) - ac          | 54.39(19) - sc          |
| Nil Form II        |          | 143.52(10) - ac           | -36.23(15) - sc         |
| Nil Form III       |          | 31.48(15) - sc            | -150.80(10) - ap        |
| Nil Form IV        | A        | -80.0(5) - sc             | 105.1(4) - ac           |
|                    | B        | 138.6(4) - ac             | -47.2(5)- sc            |
|                    | C        | -131.7(4) - ac            | 47.2(5) - sc            |
| Nil Form V         | A        | 145.1(2) - ac             | -23.1(3) -sp            |
|                    | B        | -140.9(2) - ac            | 25.4(3) - sp            |
| [Nil·Hyd] (2:0.57) | A        | 129.47(12) - ac           | -47.71(16) - sc         |
|                    | B        | -148.78(12) - ac          | 44.00(16) - sc          |
| [Nil+Adn] (1:1)    |          | 160.3(3) - ap             | -18.6(4) - sp           |

ac: anti-clinal; sc – syn-clinal; ap: anti-periplanar;sp- syn-periplanar

## References

1. A. O. Surov, A. P. Voronin, K. V. Drozd, M. S. Gruzdev, G. L. Perlovich, J. Prashanth and S. Balasubramanian, *PCCP*, 2021, **23**, 9695-9708.
2. L. J. Thompson, N. Elias, L. Male and M. Tremayne, *Cryst. Growth Des.*, 2013, **13**, 1464-1472.
3. N. S. Trasi and L. S. Taylor, *CrystEngComm*, 2014, **16**, 7186-7195.
